# Supplementary material for: Polyzwitterion–SiO2 Double-Network Polymer Electrolyte with High Strength and High Ionic Conductivity
Source: MDPI journal article supplement (doi:10.3390/polym15020466), 2023-01-16
Supplement: s1 [file s1]

## Supporting Information

### **Polyzwitterion-SiO<sub>2</sub> Double Network Polymer Electrolyte with High Strength and High Ionic Conductivity**

*Lei Zhang,<sup>a</sup>Haiqi Gao,<sup>b\*</sup>Lixiang Guan<sup>d</sup>Yuchao Li<sup>c\*</sup> and Qian Wang<sup>d\*</sup>*

*<sup>a</sup>School of Materials and Chemical Engineering, Chuzhou University, 1528 Fengle Avenue, Chuzhou 239099, China.*

*<sup>b</sup>State Key Laboratory of Chemistry and Utilization of Carbon Based Energy Resources; College of Chemistry, Xinjiang University, Urumqi 830017, Xinjiang, PR China.*

*<sup>c</sup>School of Materials Science and Engineering, Liaocheng University, 252000, PR China.*

*<sup>d</sup>Institute of Energy Innovation, College of Materials Science and Engineering, Taiyuan University of Technology, Taiyuan 030024, China.*

*E-mail:*                      qianwang19930825@163.com;                      liyuchao@lcu.edu.cn;  
iamhqgao@njupt.edu.cn

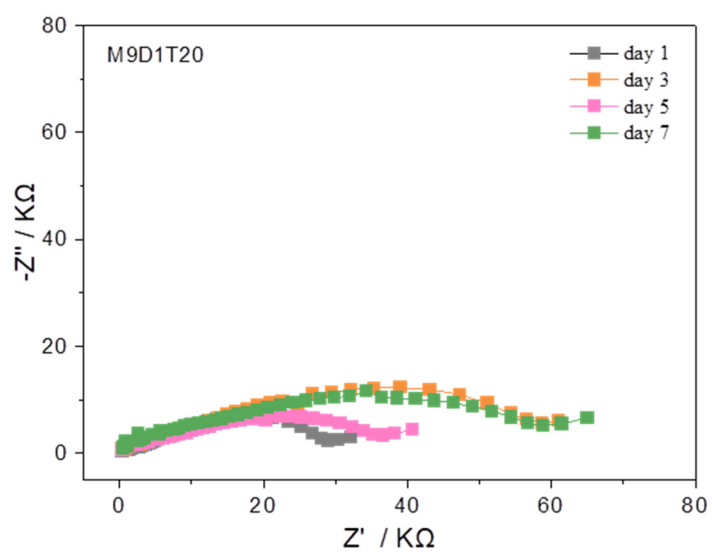

**Figure S1.** EIS of Li/Li cell using M9D1T20.

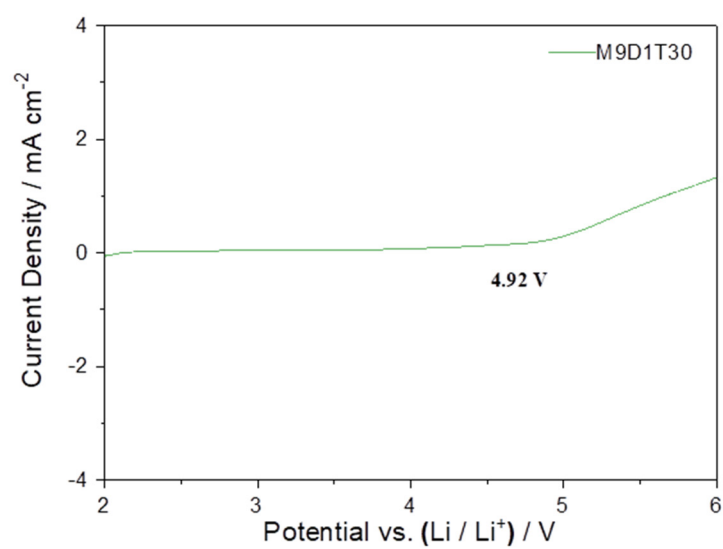

**Figure S2.** Electrochemical stability of M9D1T30

**Table S1.** Weight percentage of each component of MxDyTz, the strength, stress and ionic conductivity also are shown.

| MxDyTz   | W <sub>MPC</sub><br>(%) | W <sub>DPS</sub> (%) | W <sub>TEOS</sub><br>(%) | Stress/<br>% | Strain/<br>Mpa | Ionic<br>conductivity /<br>mS cm <sup>-1</sup> (30<br>°C) |
|----------|-------------------------|----------------------|--------------------------|--------------|----------------|-----------------------------------------------------------|
| M5D5T20  | 5                       | 5                    | 20                       | 0.3          | 195            | 0.16                                                      |
| M10D0T20 | 10                      | 0                    | 20                       | 0.45         | 367            | 0.44                                                      |
| M9D1T15  | 9                       | 1                    | 15                       | 0.24         | 419            | \                                                         |
| M9D1T20  | 9                       | 1                    | 20                       | 0.55         | 439            | 0.31                                                      |
| M9D1T25  | 9                       | 1                    | 25                       | 0.27         | 560            | \                                                         |
| M9D1T30  | 9                       | 1                    | 30                       | 0.75         | 569            | 0.3                                                       |
| M9D1T35  | 9                       | 1                    | 35                       | 0.28         | 550            | \                                                         |
